# Supplementary material
Source: Research Square preprint supplement (doi:10.21203/rs.3.rs-8950262/v1)
Supplement: Supplementary file 1 [file ecf92d34b2fb9cfd933e39f9.docx]

Highlights

1. The Drude-Lorentz is applied model to study transparent-conducting-oxide nature of GZO.
2. Prediction of high absorption and optical conductivity leading to high transparency.
3. Study of gain-assisted superluminal light propagation via negative/positive phase and group velocity.
4. Rotary optical drag
